# Supplementary material for: Association between maternal erythrocyte PUFAs during pregnancy and neurodevelopment in children at 2 years of age: a birth cohort study
Source: Royal Society of Chemistry journal article supplement (doi:10.1039/d3fo01853a), 2023-01-01
Supplement: d3fo01853a1.pdf [file d3fo01853a1.pdf]

**Supplemental table S1 Fatty acids composition of maternal erythrocyte membrane during pregnancy grouped by neurodevelopment outcome**

|                | ASQ-3(Mean ± SD <sup>a</sup> ) |                      |                     |                     |              |              |                 |              |                 |              |
|----------------|--------------------------------|----------------------|---------------------|---------------------|--------------|--------------|-----------------|--------------|-----------------|--------------|
|                | Communication                  |                      | Gross motor         |                     | Fine motor   |              | Problem solving |              | Personal-social |              |
|                | normal                         | delayed <sup>b</sup> | normal              | delayed             | normal       | delayed      | normal          | delayed      | normal          | delayed      |
|                | (N=185)                        | (N=57)               | (N=182)             | (N=60)              | (N=182)      | (N=60)       | (N=211)         | (N=31)       | (N=199)         | (N=43)       |
| Total SFA      | 29.79 ± 5.97                   | 29.25 ± 6.20         | 29.40 ± 5.88        | 30.46 ± 6.41        | 29.54 ± 6.05 | 30.06 ± 5.94 | 29.73 ± 5.94    | 29.19 ± 6.59 | 29.85 ± 6.21    | 28.81 ± 4.99 |
| Total MUFA     | 21.58 ± 3.85                   | 22.40 ± 4.73         | 21.72 ± 4.32        | 21.96 ± 3.29        | 21.90 ± 4.11 | 21.41 ± 4.00 | 21.73 ± 3.59    | 22.07 ± 6.60 | 21.80 ± 4.27    | 21.65 ± 3.12 |
| Total n-6 PUFA | 35.18 ± 4.31                   | 34.96 ± 4.33         | 35.29 ± 4.24        | 34.64 ± 4.48        | 35.26 ± 4.41 | 34.72 ± 3.97 | 35.15 ± 4.24    | 34.99 ± 4.82 | 34.98 ± 4.38    | 35.81 ± 3.92 |
| LA             | 15.12 ± 2.40                   | 15.00 ± 2.58         | 15.06 ± 2.33        | 15.17 ± 2.76        | 15.25 ± 2.53 | 14.59 ± 2.09 | 15.08 ± 2.42    | 15.15 ± 2.60 | 15.09 ± 2.48    | 15.09 ± 2.29 |
| GLA            | 0.28 ± 0.34                    | 0.28 ± 0.30          | 0.28 ± 0.34         | 0.27 ± 0.30         | 0.29 ± 0.37  | 0.23 ± 0.17  | 0.28 ± 0.32     | 0.28 ± 0.41  | 0.28 ± 0.33     | 0.24 ± 0.33  |
| DGLA           | 2.46 ± 0.61                    | 2.38 ± 0.61          | <b>2.48 ± 0.63*</b> | <b>2.30 ± 0.53*</b> | 2.46 ± 0.65  | 2.38 ± 0.46  | 2.42 ± 0.60     | 2.56 ± 0.70  | 2.44 ± 0.64     | 2.41 ± 0.47  |
| AA             | 16.79 ± 3.06                   | 16.74 ± 3.17         | 16.93 ± 3.01        | 16.32 ± 3.28        | 16.73 ± 3.12 | 16.92 ± 2.98 | 16.83 ± 3.04    | 16.41 ± 3.39 | 16.61 ± 3.10    | 17.57 ± 2.89 |
| Total n-3 PUFA | 9.80 ± 2.58                    | 9.92 ± 2.96          | 9.84 ± 2.68         | 9.77 ± 2.65         | 9.83 ± 2.73  | 9.81 ± 2.51  | 9.78 ± 2.70     | 10.14 ± 2.44 | 9.76 ± 2.71     | 10.14 ± 2.46 |
| ALA            | 0.41 ± 0.60                    | 0.27 ± 0.19          | 0.37 ± 0.56         | 0.38 ± 0.47         | 0.37 ± 0.56  | 0.37 ± 0.47  | 0.35 ± 0.50     | 0.53 ± 0.71  | 0.39 ± 0.58     | 0.31 ± 0.26  |

|                    |              |               |                     |                     |              |              |              |              |              |               |
|--------------------|--------------|---------------|---------------------|---------------------|--------------|--------------|--------------|--------------|--------------|---------------|
| EPA                | 0.99 ± 0.50  | 1.05 ± 0.49   | <b>1.04 ± 0.50*</b> | <b>0.89 ± 0.46*</b> | 1.01 ± 0.51  | 1.01 ± 0.46  | 1.00 ± 0.50  | 1.06 ± 0.51  | 0.99 ± 0.50  | 1.07 ± 0.47   |
| DPA                | 1.23 ± 0.60  | 1.24 ± 0.60   | 1.23 ± 0.59         | 1.23 ± 0.62         | 1.23 ± 0.59  | 1.24 ± 0.63  | 1.25 ± 0.59  | 1.14 ± 0.64  | 1.22 ± 0.60  | 1.29 ± 0.58   |
| DHA                | 7.48 ± 2.73  | 7.55 ± 2.83   | 7.59 ± 2.69         | 7.23 ± 2.92         | 7.47 ± 2.68  | 7.59 ± 2.96  | 7.53 ± 2.74  | 7.31 ± 2.86  | 7.45 ± 2.77  | 7.73 ± 2.68   |
| n-6/n-3 PUFA ratio | 3.68 ± 0.98  | 3.64 ± 0.92   | 3.63 ± 0.93         | 3.79 ± 1.06         | 3.69 ± 0.95  | 3.63 ± 1.01  | 3.68 ± 0.97  | 3.63 ± 0.93  | 3.69 ± 1.01  | 3.58 ± 0.74   |
| AA/EPA ratio       | 20.60 ± 9.31 | 19.87 ± 10.09 | 19.82 ± 9.31        | 22.26 ± 9.85        | 20.54 ± 9.82 | 20.07 ± 8.47 | 20.63 ± 9.54 | 19.00 ± 9.12 | 20.48 ± 9.27 | 20.16 ± 10.53 |
| AA/DHA ratio       | 2.50 ± 0.82  | 2.45 ± 0.74   | 2.47 ± 0.79         | 2.54 ± 0.82         | 2.48 ± 0.79  | 2.51 ± 0.81  | 2.49 ± 0.80  | 2.47 ± 0.76  | 2.49 ± 0.82  | 2.47 ± 0.67   |

a. SD: standard deviation

b. Children with scores lower than the 25th percentile were considered potentially delayed in that domain. Otherwise, they were normal.

\*:  $p < 0.05$ .

**Supplemental table S2 Linear association between maternal PUFAs during pregnancy and children neurodevelopment at 2 years of age**

a

|                                      | [ $\beta$ (95%)] <sup>b</sup> |                     |                      |                     |                             |
|--------------------------------------|-------------------------------|---------------------|----------------------|---------------------|-----------------------------|
|                                      | communication                 | gross motor         | fine motor           | problem solving     | personal-social             |
| Total n-6 PUFA (ref T1) <sup>c</sup> |                               |                     |                      |                     |                             |
| T2                                   | 0.01 (-4.18, 4.20)            | -0.35 (-2.54, 1.83) | -1.76 (-4.30, 0.78)  | -0.23 (-3.07, 2.62) | -3.97 (-7.68, -0.27)        |
| T3                                   | 0.54 (-3.49, 4.57)            | 1.08 (-1.02, 3.18)  | 0.65 (-1.80, 3.10)   | 0.17 (-2.57, 2.91)  | -2.87 (-6.43, 0.70)         |
| <i>p</i> for trend                   | 0.810                         | 0.386               | 0.796                | 0.930               | 0.077                       |
| LA (ref T1)                          |                               |                     |                      |                     |                             |
| T2                                   | -0.86 (-5.03, 3.31)           | -0.46 (-2.65, 1.73) | -0.60 (-3.13, 1.93)  | -1.42 (-4.23, 1.40) | -1.22 (-4.97, 2.52)         |
| T3                                   | 2.48 (-1.60, 6.56)            | 0.71 (-1.43, 2.86)  | 2.27 (-0.21, 4.74)   | 1.89 (-0.86, 4.64)  | -1.22 (-4.88, 2.44)         |
| <i>p</i> for trend                   | 0.221                         | 0.499               | 0.067                | 0.165               | 0.519                       |
| GLA (ref T1)                         |                               |                     |                      |                     |                             |
| T2                                   | -0.39 (-4.46, 3.67)           | -0.75 (-2.87, 1.38) | -1.11 (-3.58, 1.36)  | 0.41 (-2.35, 3.17)  | 0.17 (-3.43, 3.77)          |
| T3                                   | -1.10 (-5.30, 3.10)           | -0.78 (-2.98, 1.42) | 0.80 (-1.76, 3.36)   | 0.73 (-2.13, 3.58)  | 3.33 (-0.39, 7.06)          |
| <i>p</i> for trend                   | 0.608                         | 0.482               | 0.553                | 0.617               | 0.081                       |
| DGLA (ref T1)                        |                               |                     |                      |                     |                             |
| T2                                   | -2.19 (-6.27, 1.89)           | -0.24 (-2.38, 1.90) | -2.57 (-5.05, -0.10) | 0.09 (-2.67, 2.84)  | -2.23 (-5.86, 1.40)         |
| T3                                   | -1.00 (-5.17, 3.17)           | 0.27 (-1.92, 2.46)  | -1.06 (-3.59, 1.48)  | -2.46 (-5.28, 0.35) | -3.34 (-7.05, 0.37)         |
| <i>p</i> for trend                   | 0.619                         | 0.818               | 0.385                | 0.092               | 0.075                       |
| AA (ref T1)                          |                               |                     |                      |                     |                             |
| T2                                   | -2.32 (-6.42, 1.79)           | 0.60 (-1.56, 2.75)  | -1.25 (-3.74, 1.25)  | -0.34 (-3.14, 2.45) | -2.68 (-6.31, 0.95)         |
| T3                                   | -1.17 (-5.31, 2.97)           | 0.34 (-1.83, 2.51)  | -2.49 (-5.00, 0.03)  | -0.56 (-3.37, 2.26) | <b>-4.33 (-7.99, -0.66)</b> |

|                             |                     |                     |                      |                     |                     |
|-----------------------------|---------------------|---------------------|----------------------|---------------------|---------------------|
| <i>p</i> for trend          | 0.479               | 0.705               | 0.056                | 0.696               | <b>0.019</b>        |
| Total n-3 PUFA (ref T1)     |                     |                     |                      |                     |                     |
| T2                          | -0.81 (-4.83, 3.22) | -0.01 (-2.12, 2.10) | -2.55 (-4.99, -0.11) | -1.46 (-4.19, 1.27) | -1.38 (-4.98, 2.22) |
| T3                          | -2.02 (-6.03, 1.99) | 0.64 (-1.46, 2.75)  | -0.87 (-3.30, 1.56)  | -0.68 (-3.40, 2.05) | -0.38 (-3.97, 3.20) |
| <i>p</i> for trend          | 0.322               | 0.547               | 0.492                | 0.629               | 0.838               |
| ALA (ref T1)                |                     |                     |                      |                     |                     |
| T2                          | 0.54 (-3.60, 4.68)  | 1.64 (-0.52, 3.80)  | 1.58 (-0.95, 4.10)   | -0.08 (-2.90, 2.74) | 1.77 (-1.93, 5.47)  |
| T3                          | 1.87 (-2.19, 5.94)  | 1.65 (-0.47, 3.77)  | 1.09 (-1.39, 3.57)   | -0.90 (-3.66, 1.86) | 1.11 (-2.52, 4.74)  |
| <i>p</i> for trend          | 0.348               | 0.200               | 0.543                | 0.486               | 0.686               |
| EPA (ref T1)                |                     |                     |                      |                     |                     |
| T2                          | 0.98 (-3.09, 5.05)  | 2.42 (0.29, 4.54)   | 0.40 (-2.10, 2.90)   | 1.21 (-1.58, 3.99)  | 0.65 (-3.01, 4.32)  |
| T3                          | -3.00 (-7.29, 1.28) | 1.71 (-0.53, 3.94)  | -1.22 (-3.85, 1.41)  | 0.31 (-2.62, 3.24)  | -0.87 (-4.73, 2.98) |
| <i>p</i> for trend          | 0.084               | 0.347               | 0.252                | 0.960               | 0.532               |
| DPA (ref T1)                |                     |                     |                      |                     |                     |
| T2                          | -1.41 (-5.52, 2.69) | 0.55 (-1.60, 2.71)  | -1.38 (-3.89, 1.13)  | -0.19 (-2.97, 2.60) | -3.20 (-6.85, 0.46) |
| T3                          | 0.99 (-3.31, 5.29)  | 0.44 (-1.81, 2.70)  | -1.70 (-4.33, 0.93)  | -1.94 (-4.86, 0.98) | -2.85 (-6.67, 0.98) |
| <i>p</i> for trend          | 0.637               | 0.704               | 0.208                | 0.187               | 0.152               |
| DHA (ref T1)                |                     |                     |                      |                     |                     |
| T2                          | 1.96 (-2.09, 6.01)  | 0.19 (-1.94, 2.33)  | 0.22 (-2.25, 2.69)   | 2.74 (-0.01, 5.48)  | -1.05 (-4.69, 2.59) |
| T3                          | -1.47 (-5.73, 2.79) | -0.14 (-2.39, 2.10) | -2.24 (-4.83, 0.36)  | 0.50 (-2.38, 3.38)  | -1.64 (-5.46, 2.19) |
| <i>p</i> for trend          | 0.509               | 0.902               | 0.094                | 0.721               | 0.399               |
| n-6/n-3 PUFA ratio (ref T1) |                     |                     |                      |                     |                     |
| T2                          | -0.16 (-4.36, 4.04) | 0.15 (-2.05, 2.36)  | 1.39 (-1.18, 3.95)   | -0.46 (-3.31, 2.39) | -2.76 (-6.50, 0.98) |
| T3                          | 2.16 (-2.10, 6.43)  | 0.40 (-1.84, 2.64)  | 1.91 (-0.69, 4.52)   | 1.31 (-1.59, 4.20)  | -0.39 (-4.19, 3.42) |
| <i>p</i> for trend          | 0.310               | 0.723               | 0.152                | 0.362               | 0.877               |
| AA/EPA ratio (ref T1)       |                     |                     |                      |                     |                     |

|                       |                     |                     |                     |                     |                     |
|-----------------------|---------------------|---------------------|---------------------|---------------------|---------------------|
| T2                    | 2.98 (-1.07, 7.04)  | -0.68 (-2.81, 1.44) | 0.51 (-1.98, 2.99)  | 1.41 (-1.35, 4.16)  | 0.13 (-3.50, 3.77)  |
| T3                    | 0.92 (-3.29, 5.14)  | -1.65 (-3.85, 0.56) | -0.64 (-3.22, 1.94) | -0.66 (-3.52, 2.20) | -1.37 (-5.15, 2.41) |
| <i>p</i> for trend    | 0.721               | 0.142               | 0.601               | 0.601               | 0.461               |
| AA/DHA ratio (ref T1) |                     |                     |                     |                     |                     |
| T2                    | -1.58 (-5.74, 2.57) | -0.82 (-2.99, 1.36) | -0.35 (-2.89, 2.20) | -0.37 (-3.20, 2.45) | -0.35 (-4.07, 3.37) |
| T3                    | 0.76 (-3.52, 5.03)  | -0.26 (-2.50, 1.99) | -0.59 (-3.21, 2.03) | -0.83 (-3.75, 2.08) | -1.19 (-5.02, 2.64) |
| <i>p</i> for trend    | 0.607               | 0.915               | 0.665               | 0.573               | 0.530               |

a. The model was adjusted for maternal age, prenatal BMI, maternal education level, per capita monthly household income, parity, mode of delivery, gestational age, GDM, child's sex, birthweight, and breastfeeding pattern.

b. CI: confidence interval.

c. Ref: reference; The fatty acids in the table were divided into T1, T2 and T3 groups according to content, with the lowest content group as reference.

**Supplemental table S3 Associations between maternal PUFAs status during pregnancy and children neurodevelopment at 2 years of age<sup>a</sup>**

|                         | [OR (95%)]        |                   |                   |                   |                          |
|-------------------------|-------------------|-------------------|-------------------|-------------------|--------------------------|
|                         | communication     | gross motor       | fine motor        | problem solving   | personal-social          |
| Total n-6 PUFA (ref T1) |                   |                   |                   |                   |                          |
| T2                      | 1.17 (0.56, 2.43) | 0.79 (0.38, 1.59) | 0.96 (0.48, 1.91) | 0.95 (0.47, 1.94) | 1.38 (0.70, 2.74)        |
| T3                      | 1.07 (0.51, 2.25) | 0.72 (0.35, 1.47) | 0.57 (0.27, 1.19) | 1.07 (0.53, 2.15) | 1.51 (0.77, 2.99)        |
| <i>p</i> for trend      | 0.808             | 0.348             | 0.186             | 0.893             | 0.219                    |
| LA (ref T1)             |                   |                   |                   |                   |                          |
| T2                      | 0.78 (0.38, 1.59) | 1.24 (0.61, 2.54) | 0.70 (0.34, 1.40) | 1.08 (0.54, 2.16) | 0.75 (0.38, 1.49)        |
| T3                      | 0.71 (0.34, 1.47) | 1.00 (0.48, 2.08) | 0.55 (0.26, 1.13) | 0.77 (0.37, 1.57) | 1.12 (0.58, 2.16)        |
| <i>p</i> for trend      | 0.357             | 0.993             | 0.104             | 0.469             | 0.724                    |
| GLA (ref T1)            |                   |                   |                   |                   |                          |
| T2                      | 1.00 (0.47, 2.11) | 1.07 (0.52, 2.18) | 0.88 (0.44, 1.77) | 1.00 (0.49, 2.03) | 0.72 (0.37, 1.38)        |
| T3                      | 1.25 (0.60, 2.59) | 0.95 (0.46, 1.96) | 0.63 (0.30, 1.30) | 1.02 (0.50, 2.06) | <b>0.50 (0.25, 0.99)</b> |
| <i>p</i> for trend      | 0.540             | 0.883             | 0.216             | 0.962             | <b>0.048</b>             |
| DGLA (ref T1)           |                   |                   |                   |                   |                          |
| T2                      | 1.00 (0.49, 2.05) | 0.69 (0.34, 1.37) | 1.49 (0.73, 3.10) | 0.76 (0.36, 1.57) | 0.84 (0.42, 1.65)        |
| T3                      | 0.82 (0.39, 1.72) | 0.56 (0.27, 1.14) | 1.25 (0.60, 2.64) | 1.30 (0.65, 2.60) | 1.21 (0.62, 2.34)        |
| <i>p</i> for trend      | 0.608             | 0.112             | 0.554             | 0.445             | 0.573                    |
| AA (ref T1)             |                   |                   |                   |                   |                          |
| T2                      | 1.43 (0.69, 2.98) | 0.70 (0.34, 1.40) | 0.89 (0.42, 1.84) | 0.95 (0.47, 1.92) | 1.55 (0.79, 3.11)        |
| T3                      | 1.08 (0.51, 2.29) | 0.55 (0.26, 1.13) | 1.14 (0.56, 2.31) | 0.88 (0.43, 1.78) | 1.61 (0.82, 3.22)        |
| <i>p</i> for trend      | 0.721             | 0.099             | 0.796             | 0.731             | 0.148                    |

|                             |                   |                          |                   |                   |                   |
|-----------------------------|-------------------|--------------------------|-------------------|-------------------|-------------------|
| Total n-3 PUFA (ref T1)     |                   |                          |                   |                   |                   |
| T2                          | 0.80 (0.38, 1.66) | 0.92 (0.45, 1.88)        | 1.65 (0.82, 3.42) | 1.27 (0.63, 2.60) | 0.78 (0.40, 1.52) |
| T3                          | 0.98 (0.48, 2.02) | 0.86 (0.42, 1.76)        | 1.06 (0.50, 2.25) | 1.12 (0.55, 2.31) | 0.88 (0.45, 1.70) |
| <i>p</i> for trend          | 0.973             | 0.682                    | 0.909             | 0.761             | 0.701             |
| ALA (ref T1)                |                   |                          |                   |                   |                   |
| T2                          | 0.95 (0.47, 1.92) | 0.50 (0.24, 1.01)        | 0.64 (0.31, 1.31) | 0.59 (0.28, 1.22) | 0.76 (0.39, 1.49) |
| T3                          | 0.56 (0.26, 1.18) | 0.53 (0.26, 1.07)        | 0.73 (0.36, 1.46) | 0.94 (0.48, 1.86) | 0.80 (0.41, 1.54) |
| <i>p</i> for trend          | 0.112             | 0.134                    | 0.491             | 0.876             | 0.585             |
| EPA (ref T1)                |                   |                          |                   |                   |                   |
| T2                          | 0.86 (0.40, 1.84) | <b>0.41 (0.19, 0.83)</b> | 1.00 (0.47, 2.11) | 0.66 (0.31, 1.37) | 1.20 (0.61, 2.37) |
| T3                          | 1.41 (0.69, 2.91) | <b>0.45 (0.22, 0.90)</b> | 1.50 (0.74, 3.08) | 1.22 (0.62, 2.42) | 1.44 (0.74, 2.85) |
| <i>p</i> for trend          | 0.233             | <b>0.068</b>             | 0.205             | 0.331             | 0.295             |
| DPA (ref T1)                |                   |                          |                   |                   |                   |
| T2                          | 1.31 (0.64, 2.70) | 0.67 (0.32, 1.37)        | 1.39 (0.68, 2.86) | 0.82 (0.39, 1.68) | 1.13 (0.57, 2.25) |
| T3                          | 0.94 (0.44, 2.00) | 0.84 (0.42, 1.69)        | 1.09 (0.52, 2.28) | 1.22 (0.61, 2.45) | 1.52 (0.78, 3.00) |
| <i>p</i> for trend          | 0.871             | 0.630                    | 0.835             | 0.545             | 0.211             |
| DHA (ref T1)                |                   |                          |                   |                   |                   |
| T2                          | 0.82 (0.39, 1.72) | 0.84 (0.41, 1.70)        | 0.94 (0.44, 2.00) | 0.60 (0.29, 1.23) | 1.14 (0.59, 2.24) |
| T3                          | 1.00 (0.49, 2.05) | 0.82 (0.40, 1.67)        | 1.56 (0.78, 3.20) | 0.78 (0.39, 1.55) | 1.06 (0.54, 2.08) |
| <i>p</i> for trend          | 0.998             | 0.585                    | 0.205             | 0.471             | 0.864             |
| n-6/n-3 PUFA ratio (ref T1) |                   |                          |                   |                   |                   |
| T2                          | 1.61 (0.79, 3.35) | 1.52 (0.74, 3.16)        | 0.69 (0.34, 1.40) | 1.22 (0.61, 2.45) | 1.52 (0.78, 3.00) |
| T3                          | 0.93 (0.43, 2.00) | 1.23 (0.59, 2.60)        | 0.68 (0.33, 1.37) | 0.82 (0.39, 1.68) | 1.13 (0.57, 2.25) |
| <i>p</i> for trend          | 0.863             | 0.580                    | 0.274             | 0.597             | 0.727             |
| AA/EPA ratio (ref T1)       |                   |                          |                   |                   |                   |

|                       |                   |                          |                   |                   |                   |
|-----------------------|-------------------|--------------------------|-------------------|-------------------|-------------------|
| T2                    | 0.52 (0.24, 1.09) | 1.06 (0.49, 2.30)        | 1.12 (0.55, 2.31) | 0.57 (0.27, 1.18) | 0.78 (0.40, 1.52) |
| T3                    | 0.81 (0.40, 1.64) | <b>2.00 (0.99, 4.16)</b> | 1.05 (0.51, 2.18) | 0.93 (0.47, 1.83) | 0.88 (0.45, 1.70) |
| <i>p</i> for trend    | 0.625             | <b>0.045</b>             | 0.907             | 0.905             | 0.726             |
| AA/DHA ratio (ref T1) |                   |                          |                   |                   |                   |
| T2                    | 1.85 (0.90, 3.86) | 1.43 (0.69, 2.98)        | 0.88 (0.42, 1.85) | 1.24 (0.61, 2.54) | 1.15 (0.58, 2.29) |
| T3                    | 1.00 (0.46, 2.18) | 1.32 (0.64, 2.76)        | 1.37 (0.68, 2.79) | 1.22 (0.60, 2.49) | 1.50 (0.77, 2.94) |
| <i>p</i> for trend    | 0.802             | 0.525                    | 0.311             | 0.627             | 0.227             |

a. The model was adjusted for nothing.

b. OR: odds ratio; CI: confidence interval.

c. Ref: reference; The fatty acids in the table were divided into T1, T2 and T3 groups according to content, with the lowest content group as reference. Children with scores lower than the 25th percentile were considered potentially delayed in that domain. Otherwise, they were normal. The cut off values of communication, gross motor, fine motor, problem solving and personal-social were 50.00, 53.75, 48.75, 40.00, 35.00, respectively.
